# Supplementary material for: Tumor-targeted supramolecular nanoparticles self-assembled from a ruthenium-β-cyclodextrin complex and an adamantane-functionalized peptide
Source: Royal Society of Chemistry journal article supplement (doi:10.1039/c6cc08296c), 2016-11-24
Supplement: c6cc08296c1.pdf [file c6cc08296c1.pdf]

# Electronic Supporting Information

## Table of Contents

### Supporting Materials and Methods

|                                                             |    |
|-------------------------------------------------------------|----|
| Materials.....                                              | S3 |
| General methods.....                                        | S3 |
| Synthetic protocols and characterizations.....              | S3 |
| Cell lines and culture conditions.....                      | S6 |
| Cytotoxicity assay.....                                     | S6 |
| Cellular uptake studies.....                                | S7 |
| Colocalization assay.....                                   | S7 |
| Cellular uptake with metabolic or endocytic inhibitors..... | S7 |
| Hoechst staining.....                                       | S8 |
| Annexin V-FITC staining.....                                | S8 |
| Detection of cathepsin B release.....                       | S8 |
| Measurement of ROS.....                                     | S9 |
| Caspase-3/7 activity assay.....                             | S9 |
| Statistical analysis.....                                   | S9 |

## **Supporting Figures and Tables**

|                                           |                                                                                               |            |
|-------------------------------------------|-----------------------------------------------------------------------------------------------|------------|
| <b>Fig. S1</b>                            | ESI-MS spectrum of <b>Ru-CD</b> .....                                                         | <b>S10</b> |
| <b>Fig. S2</b>                            | <sup>1</sup> H NMR spectrum of <b>Ru-CD</b> .....                                             | <b>S10</b> |
| <b>Fig. S3</b>                            | UV/vis and emission spectra of <b>Ru-CD</b> and <b>Ru-CD-RGD</b> in H <sub>2</sub> O.....     | <b>S11</b> |
| <b>Fig. S4</b>                            | UV/vis and emission spectra of <b>Ru-CD</b> and <b>Ru-CD-RGD</b> in PBS.....                  | <b>S11</b> |
| <b>Fig. S5</b>                            | ITC calorimetric titration results.....                                                       | <b>S12</b> |
| <b>Fig. S6</b>                            | AFM images of <b>Ru-CD</b> , c(RGDyK)-Ad and self-assembled <b>L-RGD</b> .....                | <b>S12</b> |
| <b>Fig. S7</b>                            | Cytotoxicity profiles determined by MTT.....                                                  | <b>S13</b> |
| <b>Fig. S8</b>                            | Confocal images of cellular uptake of <b>Ru-CD-RGD</b> in U87MG cells with bloking agents.... | <b>S14</b> |
| <b>Fig. S9</b>                            | Confocal images of cellular uptake of <b>Ru-CD</b> in U87MG cells.....                        | <b>S14</b> |
| <b>Fig. S10</b>                           | Cellular uptake of analyzed by flow cytometry.....                                            | <b>S14</b> |
| <b>Fig. S11</b>                           | Colocalization of <b>Ru-CD-RGD</b> with MTDR.....                                             | <b>S15</b> |
| <b>Fig. S12</b>                           | Cellular uptake of <b>Ru-CD-RGD</b> with inhibitors.....                                      | <b>S15</b> |
| <b>Fig. S13</b>                           | Annexin V stained U87MG cells analyzed by confocal microscopy.....                            | <b>S16</b> |
| <b>Fig. S14</b>                           | Hoechst 33342 stained U87MG cells.....                                                        | <b>S17</b> |
| <b>Fig. S15</b>                           | Release of cathepsin B with the treatment of <b>Ru-CD-RGD</b> for U87MG cells.....            | <b>S18</b> |
| <b>Fig. S16</b>                           | Effects of <b>Ru-CD-RGD</b> on ROS generation analyzed by confocal microscopy.....            | <b>S18</b> |
| <b>Fig. S17</b>                           | Effects of <b>Ru-CD-RGD</b> on ROS generation analyzed by flow cytometry.....                 | <b>S19</b> |
| <b>Fig. S18</b>                           | The impact of NAC on the cytotoxicity of <b>Ru-CD-RGD</b> .....                               | <b>S19</b> |
| <b>Fig. S19</b>                           | Apoptosis induced by <b>Ru-CD-RGD</b> is caspase-dependent.....                               | <b>S20</b> |
| <b>Table S1</b>                           | Photophysical data of <b>Ru-CD</b> and <b>Ru-CD-RGD</b> .....                                 | <b>S21</b> |
| <b>Table S2</b>                           | Cell uptake levels determined by ICP-MS.....                                                  | <b>S21</b> |
| <b><u>Supporting References</u></b> ..... |                                                                                               | <b>S21</b> |

## **Supporting Materials and Methods**

### **Materials**

$\beta$ -cyclodextrin ( $\beta$ -CD) of reagent grade was recrystallized twice from H<sub>2</sub>O and dried in vacuo for 12 h at 373 K. DMF was super dry grade and stored over a molecular sieve. Ruthenium(III) chloride hydrate (Alfa Aesar), phen (1,10-phenanthroline, Alfa Aesar), c(RGDyK)-Ad (cyclic Arg-Gly-Asp peptides (c(RGDyK) conjugated with adamantine, GL Biochem (Shanghai) Ltd.), cisplatin (Sigma Aldrich), PBS (phosphate buffered saline, Sigma Aldrich), MTT (3-(4,5-dimethylthiazol-2-yl)-2,5-diphenyltetrazolium bromide, Sigma Aldrich), **MTDR** (MitoTracker Deep Red, Life Technologies, USA), **LTDR** (LysoTracker Deep Red, Life Technologies, USA), H<sub>2</sub>DCFDA (2',7'-dichlorodihydrofluorescein diacetate, Sigma Aldrich) and Hoechst 33342 (2'-(4-ethoxyphenyl)-5-(4-methyl-1-piperazinyl)-1H,3'H-2,5'-bibenzimidazole, Sigma Aldrich), Annexin V-FITC apoptosis detection kit was purchased from Sigma Aldrich, NAC (N-acetylcysteine, Sigma Aldrich), CCCP (carbonyl cyanide-m-chlorophenylhydrazone, Sigma Aldrich) and z-VAD-fmk (Sigma Aldrich) were used as received. Caspase-3/7 activity assay kit was purchased from Promega (USA). Magic Red MR-(RR)<sub>2</sub> was purchased from Immunochemistry Tech. Distilled water was purified by passing through a Millipore Milli-Q Biocel purification system (18.2 M $\Omega$ ) with a 0.22  $\mu$ m filter. Cisplatin was dissolved in saline. All the compounds tested were dissolved in distilled water just before the experiments.

### **General methods**

<sup>1</sup>H NMR spectra were recorded on a Bruker AVANCE-400 NMR spectrometer (Germany). Elemental contents were analyzed by a Perkin-Elmer 240 elemental analyzer (Germany). ESI-MS spectra were performed on a Thermo LCQ-DECA-XP spectrometer (USA). UV-vis spectra were monitored with a Varian Cary 100 UV/vis spectrophotometer (USA). The fluorescence emission spectra were obtained on an FLS 980 combined fluorescence lifetime and steady state spectrometer (Edinburgh Instrument, UK). Ru content was measured on a Thermo X Series 2 Inductively Coupled Plasma Mass Spectrometer (Thermo Fisher Corp., USA). Morphology of the supramolecular self-assembly nanoparticles was characterized by a Bruker Multimode 8 atomic force microscope (AFM) under ScanAsyst mode (Bruker, USA). Isothermal titration calorimetry (ITC) were carried out on the MicroCal ITC200 (Malvern, UK). Quantum yields of luminescence at room temperature were calculated according to literature procedures using [Ru(bpy)<sub>3</sub>]Cl<sub>2</sub> as the reference.<sup>1</sup>

## Synthetic protocols and characterizations

*Cis*-[Ru(phen)<sub>2</sub>Cl<sub>2</sub>] $\cdot$ 2H<sub>2</sub>O was synthesized using the literature method.<sup>2</sup> Ligand **L** ( $\beta$ -cyclodextrin ( $\beta$ -CD) dimer bridged by 4,4'-bipyridine) was synthesized according to our previously reported procedure.<sup>3</sup>

**Synthetic procedure of Ru-CD.** A mixture of *cis*-[Ru(phen)<sub>2</sub>Cl<sub>2</sub>] $\cdot$ 2H<sub>2</sub>O (0.24 g, 0.40 mmol) and ligand **L** (0.95 g, 0.36 mmol) was suspended in EtOH-H<sub>2</sub>O (1:1, v/v) and refluxed under an inert atmosphere of nitrogen for 8 h. The mixture was then evaporated to dryness. The residue was redissolved in a small amount of water, and then poured into acetone (200 mL) to give a reddish brown precipitate. The crude product obtained was purified by Sephadex G-25 column chromatogram (mobile phase: 0.1 M NH<sub>3</sub> $\cdot$ H<sub>2</sub>O), and recrystallized from water/acetone (v/v = 3/1) giving pure compound **Ru-CD** as a reddish brown powder. Yield: 0.68 g (57%).

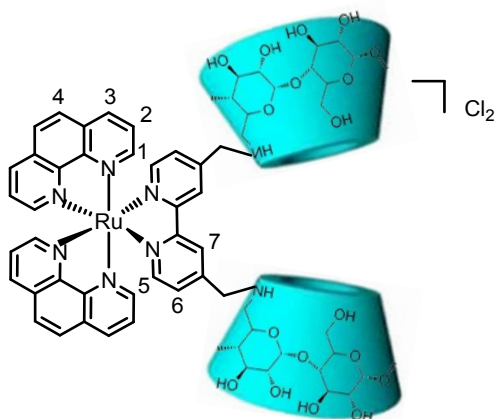

<sup>1</sup>H NMR (400 MHz, *d*<sup>6</sup>-DMSO):  $\delta$  8.80 (m, 6H; bpy-H-7 and phen-H-1), 8.37 (m, 4H; phen-H-3), 8.23 (d, 2H; bpy-H-5), 7.94 (d, 4H; phen-H-4), 7.70 (t, 4H; phen-H-2), 7.39 (d, 2H; bpy-H-6), 5.72-5.79 (14H, m, OH-2,3), 4.84 (7H, m, H-1), 4.44 (6H, m, OH-6), 3.93 (4H, s, bpy-CH<sub>2</sub>), 3.63-3.33 (28H, m, H-3,5,6), 3.33-3.23 (14H, m, H-2,4, overlaps with H<sub>2</sub>O), 2.19 (1H, s, NH). ESI-MS (H<sub>2</sub>O): *m/z* 1454.3 ([M]<sup>2+</sup>), 970.4 ([M+H]<sup>3+</sup>). Elemental analysis: calcd (%) for C<sub>120</sub>H<sub>166</sub>RuN<sub>8</sub>O<sub>68</sub>Cl<sub>2</sub> $\cdot$ 23H<sub>2</sub>O: C, 42.45; H, 6.29; N, 3.30; found: C, 42.77; H, 6.25; N, 3.12.

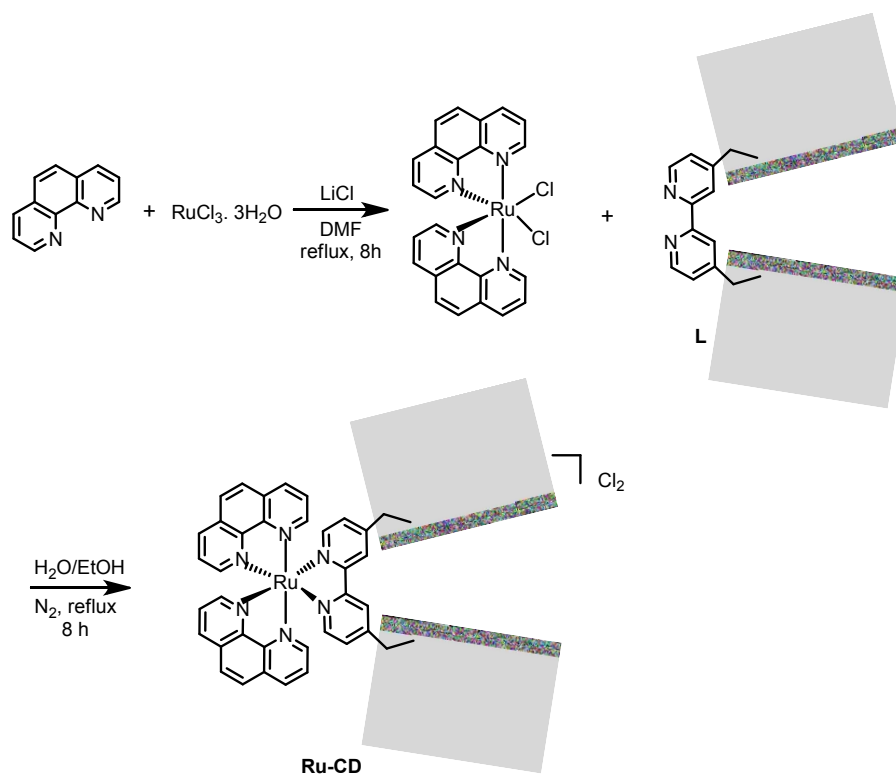

**Scheme S1.** Synthesis of **Ru-CD**.

**Synthetic procedure of Ru-CD-RGD nanoparticle.** For the preparation of **Ru-CD-RGD** nanoparticles, c(RGDyK)-Ad was added into the **Ru-CD** aqueous solution with a ratio of [**Ru-CD**]:[c(RGDyK)-Ad]=1:2 under ultrasonic agitation at 4 °C for 20 min, and the mixed solution was further stirred overnight to guarantee the formation of the self-assembled nanoparticle. The mixture was stored at 4 °C before use. The final concentration of **Ru-CD-RGD** was 650 μM, which was determined based on the content of Ru(II) in solution.

#### UV-vis titration

**Ru-CD** and c(RGDyK)-Ad were dissolved in distilled water to prepare stock solutions. c(RGDyK)-Ad was titrated into **Ru-CD** (10.0 μM) in 600 μL cuvette to achieve different ratios. After each titration, the mixture solution was allowed to stabilize for 5 min before the UV-vis spectra were recorded. The absorbance changes at 262 nm ( $\Delta A_{262}$ ) were plotted as a function of the c(RGDyK)-Ad/**Ru-CD** ratios.

#### Isothermal titration calorimetry (ITC)

ITC was employed to characterize the stoichiometry value for the binding of **Ru-CD** (Host) with c(RGDyK)-Ad (Guest). The titration experiments were carried out on the MicroCal ITC200 at 298 ±

0.1 K. The guest molecules c(RGDyK)-Ad (0.025 mM) were loaded into the 200  $\mu\text{L}$  sample cell and the host molecules **Ru-CD** (0.5 mM) were loaded into the continuously rotating (750 rpm) 40  $\mu\text{L}$  syringe. The titration was conducted by adding 1.5  $\mu\text{L}$  aliquots of the host solution into the guest solution at an interval of 2.5 min (19 injections in total). The first 1.0  $\mu\text{L}$  aliquot injection was ignored to eliminate the effect of solute diffusion across the syringe tip during the equilibration period. The titration data were fitted using a MicroCal-enabled Origin program. The value of stoichiometry  $N$ , the molar enthalpy changes ( $\Delta H$ ), entropic changes ( $\Delta S$ ) and the inclusion complex association constants  $K_a$  were calculated accordingly. The total heat produced during each injection was obtained by integrating heat flows over the time. The calculated total heat ( $\mu\text{cal}$ ) was plotted against the mole ratio of the titrant (host) to the titrate (guest).

### **Atomic force microscopy (AFM) measurement**

The aqueous solution of **Ru-CD** and c(RGDyK)-Ad was mixed together to initiate the supramolecular self-assembly process ( $[\text{Ru-CD-RGD}] = 50 \mu\text{M}$ ). Then the solution was dropped onto newly clipped mica and air-dried. The samples were analyzed using a Bruker Multimode 8 AFM under ScanAsyst mode in air at room temperature.

### **Transmission electron microscopy (TEM)**

Samples were prepared by adding 5  $\mu\text{L}$  of **Ru-CD-RGD** (50  $\mu\text{M}$ ) solution onto a carbon film supported by 300-mesh copper grid, and air-dried prior to collecting images. TEM measurements were taken with a JEOL JEM-2010HR transmission electron microscope.

### **Dynamic light scattering (DLS) measurements**

The solution of **Ru-CD-RGD** (50  $\mu\text{M}$ ) was prepared as described above. The hydrodynamic size was measured using a Brookhaven EliteSizer Nanoparticle size-Zeta potential and molecular weight analyzer at a wavelength of 677 nm with a constant angle of  $90^\circ$  at  $25^\circ\text{C}$ .

### **Cell lines and culture conditions**

Human glioblastoma (U87MG), human breast cancer (MCF-7), human lung adenocarcinoma epithelial (A549), cisplatin-resistant A549 (A549R) and human normal liver (LO2) were obtained from Experimental Animal Center of Sun Yat-Sen University (Guangzhou, China) and cultured in a humidified incubator at  $37^\circ\text{C}$  under 5%  $\text{CO}_2$ . DMEM (Dulbecco's modified Eagle's medium, Gibco BRL) or RPMI 1640 (Roswell Park Memorial Institute 1640, Gibco BRL) medium were

supplemented with 10% FBS (fetal bovine serum, Gibco BRL), 100 µg/mL streptomycin, and 100 U/mL penicillin (Gibco BRL). A549R cells were cultured in a medium containing increasing concentrations of cisplatin to maintain the resistance.

### **Cytotoxicity tests**

The cells were plated in flat-bottomed 96-well plates and incubated at 37 °C for 24 h. The blank medium was replaced by medium containing serial concentrations of the tested agents. The plates were incubated for 44 h. At the end of the drug-exposure period, 20 µL of MTT solution was added to each well and the plates were further incubated for 4 h. The medium was removed from the wells, and the purple formazan crystals were dissolved in 150 µL of DMSO per well. The absorbance at 595 nm was measured using a microplate reader (Infinite M200 Pro, Tecan, Männedorf, Switzerland). The mean absorbance reading from the wells without drug treatment was used as the control (100% viability). IC<sub>50</sub> values were determined by interpolation of the resulting curves. For the cytotoxicity assay in the presence of the inhibitors, U87MG cells were preincubated with 10 mM NAC for 1 h before the complexes were added. Percentage of cell viability was determined by MTT.

### **Cellular uptake studies**

**Confocal microscopy.** U87MG or MCF-7 cells were seeded into 35 mm dishes (Corning) and incubated for 24 h and then treated with **Ru-CD-RGD** or **Ru-CD** ([Ru] = 10 µM) for 24 h. The cells were washed twice with PBS, and viewed immediately under a confocal laser-scanning microscope (LSM 710, Carl Zeiss, Göttingen, Germany) by excitation at 488 nm. Emission was collected at 620 ± 20 nm.

**Flow cytometry.** U87MG or MCF-7 cells were cultured in 6-well tissue culture plates for 24 h and then treated with **Ru-CD-RGD** or **Ru-CD** ([Ru] = 10 µM) for 24 h. The cells were harvested and washed twice with PBS. Data were collected by flow cytometry excited at 488 nm (FACSCalibur™, Becton Dickinson, Franklin Lakes, NJ, USA) and analyzed with the FlowJo 7.6 software (Tree Star, OR, USA). Emission was collected at 620 ± 20 nm.

**ICP-MS.** U87MG or MCF-7 cells were seeded in 10 cm tissue culture dishes and incubated for 24 h. The medium was removed and replaced with fresh medium containing **Ru-CD-RGD** or **Ru-CD** ([Ru] = 10 µM). After 24 h incubation, the cells were washed with PBS and harvested. The collected cells were counted and digested with HNO<sub>3</sub> (65%, 0.5 mL). The solution was then diluted to a final volume of 10 mL with Milli-Q water. The concentration of iridium was measured using the XSERIES 2 ICP-MS.

### **Colocalization assay**

U87MG cells were seeded in 35 mm dishes for 24 h and then incubated with **Ru-CD-RGD** (10  $\mu$ M) at 37 °C for 24 h. The cells were further co-incubated with MitoTracker Deep Red (**MTDR**) (50 nM) or LysoTracker Deep Red (**LTDR**) (50 nM) at 37 °C for 0.5 h. Cells were washed three times with PBS and visualized by a confocal microscope (LSM 710, Carl Zeiss, Göttingen, Germany) immediately. **Ru-CD-RGD** was excited at 488 nm, **MTDR** and **LTDR** were excited at 633 nm. Emission was collected at  $620 \pm 20$  nm,  $665 \pm 20$  nm and  $668 \pm 20$  nm for **Ru-CD-RGD**, **MTDR** and **LTDR**, respectively.

### **Cellular uptake with metabolic or endocytic inhibitors**

U87MG cells were seeded in 35 mm dishes for 24 h and preincubated with carbonyl cyanide m-chlorophenyl hydrazone (CCCP) (30  $\mu$ M) or chloroquine (CQ) (50  $\mu$ M) for 1 h. The medium was removed and the cells were then incubated with **Ru-CD-RGD** (10  $\mu$ M) for 24 h. The cells were washed three times with PBS and visualize by a confocal microscope (LSM 710, Carl Zeiss, Göttingen, Germany) immediately.

### **Hoechst staining**

U87MG cells were seeded into 35 mm dishes (Corning) and incubated for 24 h and then treated with **Ru-CD-RGD** or cisplatin at the indicated concentrations for 24 h. The cells were then washed once with cold PBS and fixed with 4% paraformaldehyde at room temperature for 15 min. After washed with cold PBS, cells were labelled with Hoechst 33342 (5  $\mu$ g/mL in PBS) for 5 min. The cells were analyzed immediately with a confocal laser-scanning microscope (LSM 710, Carl Zeiss, Germany).

### **Annexin V-FITC staining**

**Flow cytometry.** U87MG cells were cultured in 6-well tissue culture plates for 24 h and then treated with different concentrations of **Ru-CD-RGD** for 24 h. The cells were harvested and stained using an annexin V-FITC apoptosis detection kit (Sigma Aldrich) according to the manufacturer's instructions. Data were collected by a flow cytometer (FACSCalibur™, Becton Dickinson, Franklin Lakes, NJ, USA) and analyzed with FlowJo 7.6 software (Tree Star, OR, USA).

**Confocal microscopy.** U87MG cells were seeded into 35 mm dishes (Corning) and incubated for 24 h and then treated with **Ru-CD-RGD** (10  $\mu$ M) for 24 h. The cells were washed twice with ice-cold PBS, and stained with FITC-labelled annexin at 37 °C for 15 min in the dark, then visualized immediately by confocal microscopy (LSM 710, Carl Zeiss, Göttingen, Germany).



### **Detection of cathepsin B release**

Cathepsin B activity was detected using the fluorogenic substrate Magic Red MR-(RR)<sub>2</sub> (Immunochemistry Tech, Bloomington, USA) according to the manufacturer's instructions. Briefly, U87MG or MCF-7 cells seeded into 35 mm dishes (Corning) were exposed to **Ru-CD-RGD** or cisplatin at the indicated concentrations for 24 h. The media was removed and the cells were washed twice with PBS and then incubated with Magic Red MR-(RR)<sub>2</sub> at 37 °C for 0.5 h. The media was removed and the cells were washed twice with PBS and visualized by confocal microscopy (LSM 710, Carl Zeiss, Göttingen, Germany). Emission was collected at 630 ± 20 nm upon excitation at 543 nm.

### **Measurement of intracellular reactive oxygen species (ROS)**

U87MG cells were treated with **Ru-CD-RGD** at the indicated concentrations for 24 h and then incubated with 10 μM H<sub>2</sub>DCFDA in serum-free DMEM for 15 min at 37 °C in the dark. The fluorescence intensity of the cells was measured immediately by flow cytometry (FACSCalibur™, Becton Dickinson, Franklin Lakes, NJ, USA) with excitation at 488 nm and emission at 530 nm. Green mean fluorescence intensities (MFI) were analyzed using FlowJo 7.6 software (Tree Star, OR, USA).

### **Caspase-3/7 activity assay**

Caspase-3/7 activity was measured using the Caspase-Glo® Assay kit (Promega, Madison, WI, USA) according to the manufacturer's instructions. Briefly, cells were cultured in 48-well plates and treated with different concentration of **Ru-CD-RGD** for 24 h, and then 50 μL cell lysate was added to each well, followed by the addition of 50 μL Caspase-Glo® 3/7 reagent. The mixture was incubated at room temperature for 1 h and then the luminescence was measured using a TECAN Infinite M200 station.

### **Statistical analysis**

All biological experiments were performed at least twice with triplicates in each experiment. The ANOVA method has been used in the biosystem statistics. Representative results were depicted in this report and data were presented as means ± standard deviations (SD).

## Supporting Figures and Tables

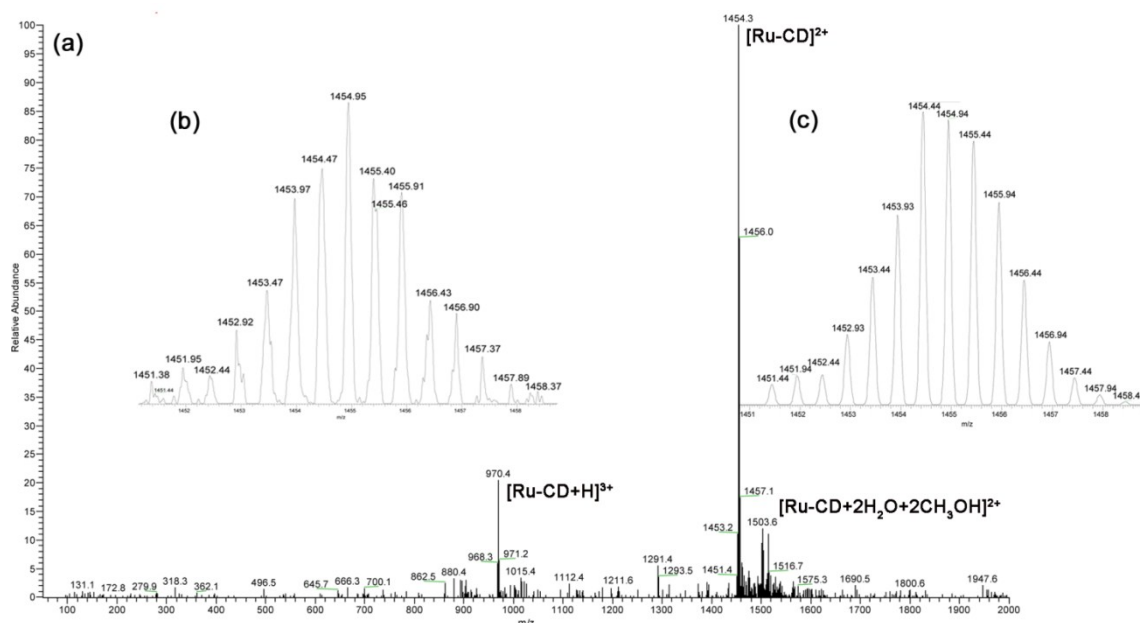

**Fig. S1** ESI-MS of **Ru-CD**: a) Full range spectra; b) Bivalence ion isotopes spectra of computer simulation using formula  $C_{120}H_{166}RuN_8O_{68}$ , which is equivalent with  $[Ru-CD]^{2+}$ ; c) Bivalence ion isotopes spectra detected.

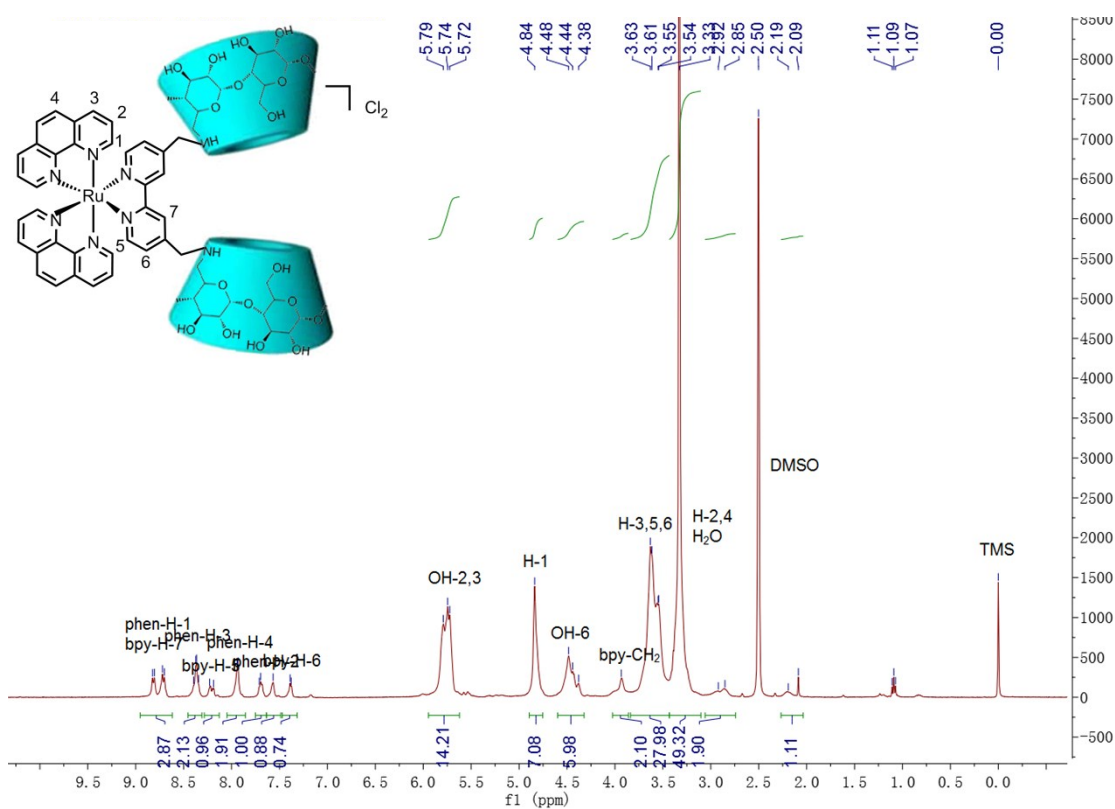

**Fig. S2**  $^1H$ -NMR spectrum of **Ru-CD** in  $d^6$ -DMSO.

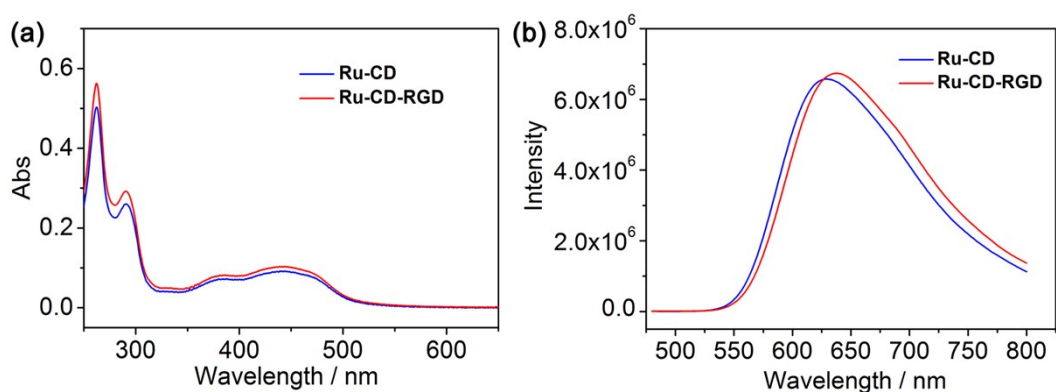

**Fig. S3** (a) UV/vis spectra of **Ru-CD** and **Ru-CD-RGD** ( $1.0 \times 10^{-5}$  M) measured in  $H_2O$ . (b) Emission spectra of **Ru-CD** and **Ru-CD-RGD** ( $1.0 \times 10^{-5}$  M) measured in  $H_2O$  ( $\lambda_{ex} = 455$  nm).

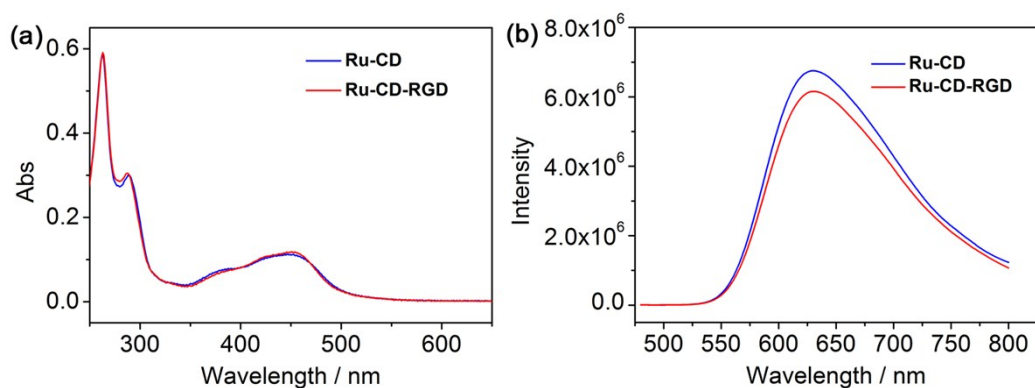

**Fig. S4** (a) UV/vis spectra of **Ru-CD** and **Ru-CD-RGD** ( $1.0 \times 10^{-5}$  M) measured in PBS. (b) Emission spectra of **Ru-CD** and **Ru-CD-RGD** ( $1.0 \times 10^{-5}$  M) measured in PBS ( $\lambda_{ex} = 455$  nm).

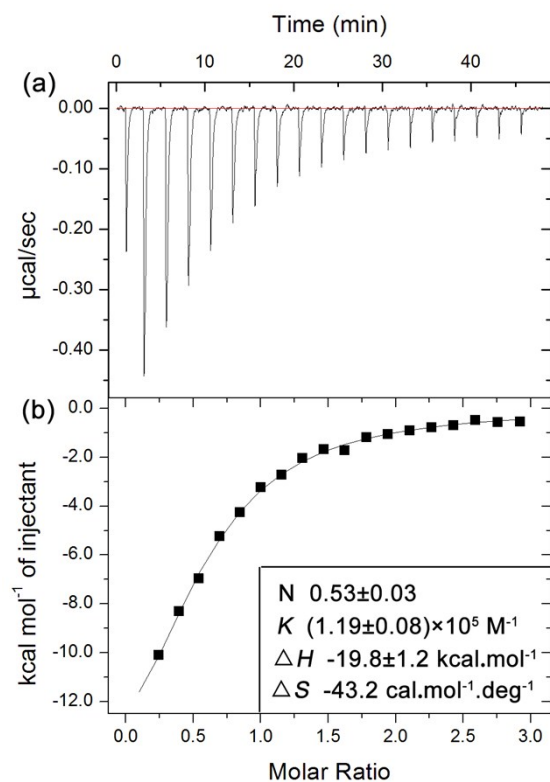

**Fig. S5** (a) ITC results of the titration of c(RGDyK)-Ad with **Ru-CD** in distilled water. (b) Integration and fitted curves of the heat signals of the microcalorimetric titrations. 1.5  $\mu\text{L}$  aliquots of **Ru-CD** (0.50 mM) were added into c(RGDyK)-Ad (0.025 mM) at an interval of 2.5 min (19 injections in total).

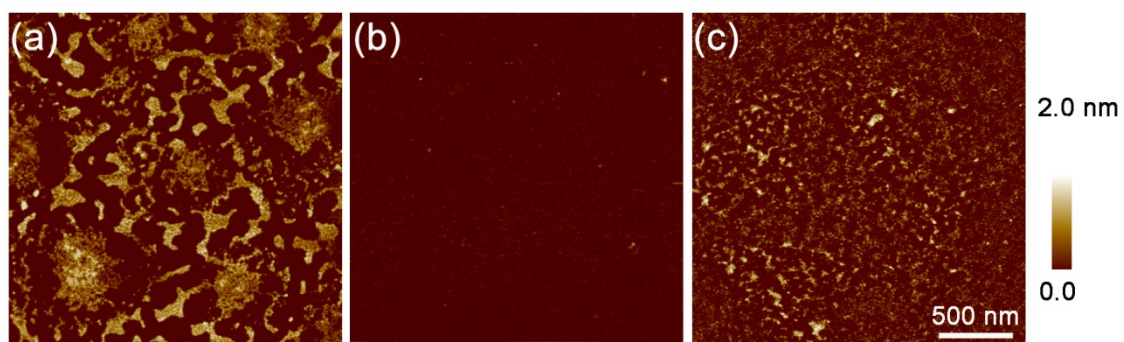

**Fig. S6** Atomic force microscopy (AFM) images ( $2.0 \times 2.0 \mu\text{m}^2$ ) of **Ru-CD** (a), c(RGDyK)-Ad (b) and self-assembled **L** with **RGD** (c). 10  $\mu\text{L}$  of sample solution was dropped onto newly clipped mica and air-dried.

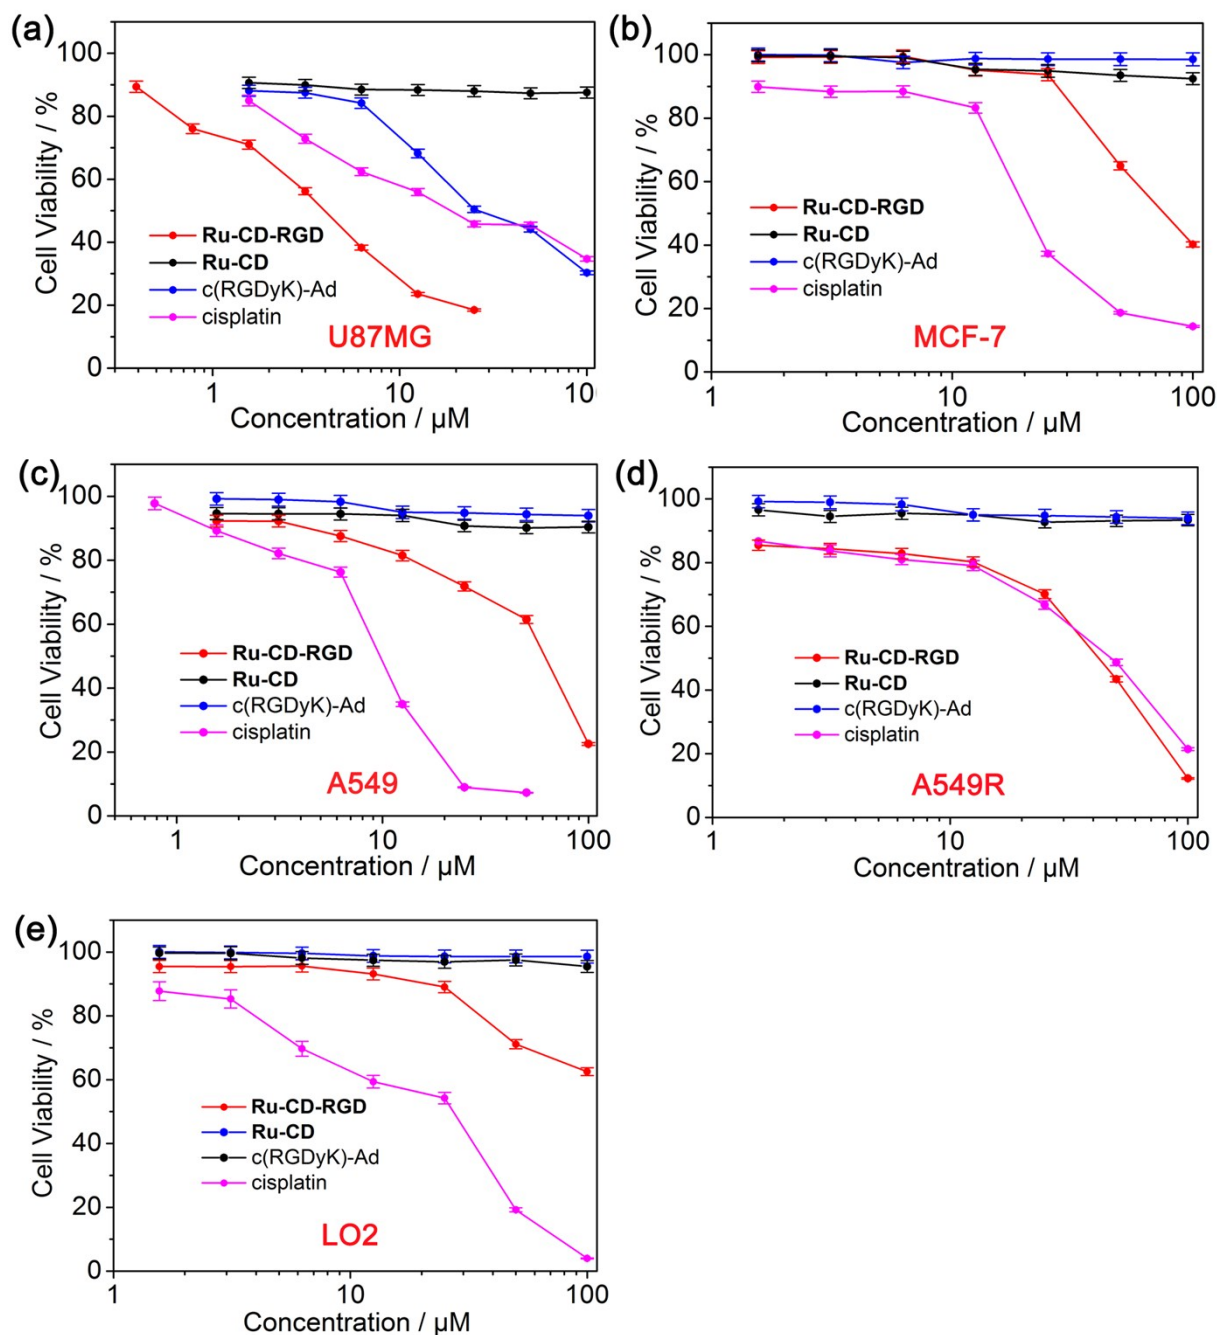

**Fig. S7** In vitro cytotoxicity of **Ru-CD-RGD**, **Ru-CD**, **c(RGDyK)-Ad** and **cisplatin** against different cell lines determined by MTT assay. The cells were treated with the tested agents for 48 h and the concentration of **Ru-CD-RGD** was determined based on the content of Ru(II) in solution. Data are represented as means  $\pm$  SD of three independent experiments.

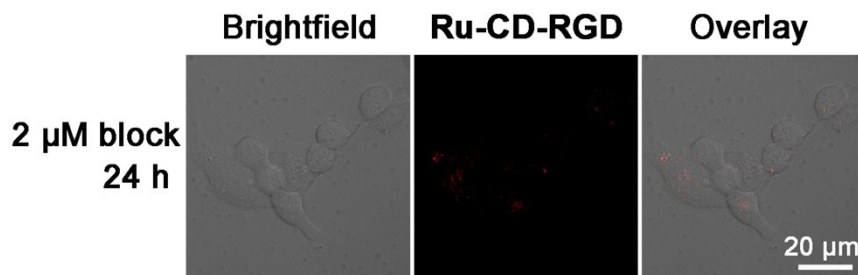

**Fig. S8** Confocal microscopic images of U87MG cells after incubated with **Ru-CD-RGD** (10  $\mu$ M based on the content of Ru(II) in solution) for 24 h with the blocking agent. "Blocking" denotes pre-incubation with 2  $\mu$ M of c(RGDyK)-Ad for 1 h before the cells were exposed to **Ru-CD-RGD**.  $\lambda_{\text{ex}} = 488 \text{ nm}$ ,  $\lambda_{\text{em}} = 620 \pm 20 \text{ nm}$ .

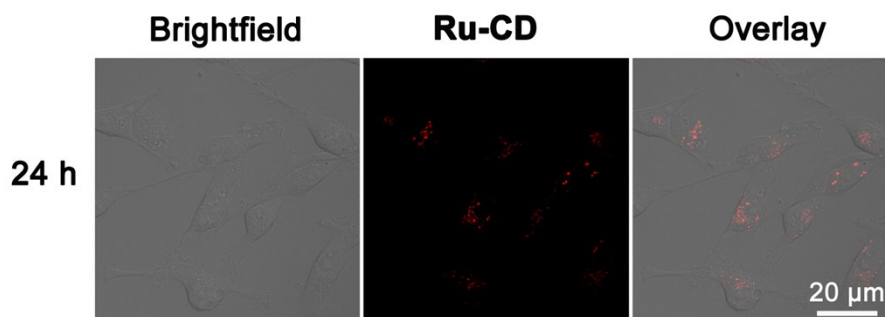

**Fig. S9** Confocal microscopic images of U87MG cells after incubated with 10  $\mu$ M **Ru-CD** for 24 h.  $\lambda_{\text{ex}} = 488 \text{ nm}$ ,  $\lambda_{\text{em}} = 620 \pm 20 \text{ nm}$ .

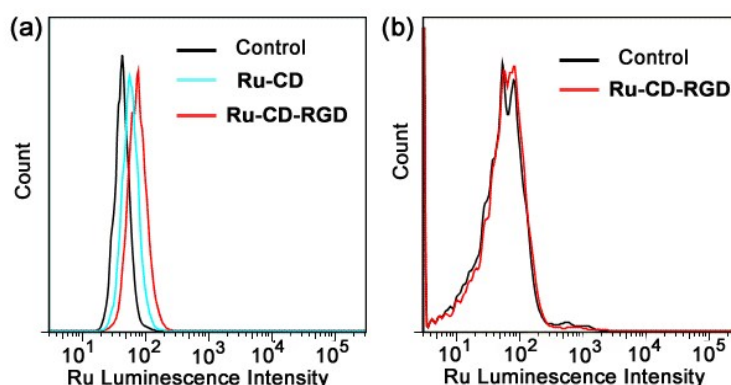

**Fig. S10** Cell uptake of **Ru-CD** (10  $\mu$ M) or **Ru-CD-RGD** (10  $\mu$ M) in U87MG (a) and MCF-7 (b) determined by flow cytometry after 24 h incubation. The mean fluorescence intensity (MFI) of U87MG cells for control, **Ru-CD**-treated and **Ru-CD-RGD**-treated cells are  $109 \pm 6$ ,  $161 \pm 8$  and  $222 \pm 11$ , respectively. The MFI of MCF-7 cells for control and **Ru-CD-RGD**-treated cells are  $83 \pm 6$  and  $86 \pm 7$ , respectively. Data are represented as means  $\pm$  SD of three independent experiments.

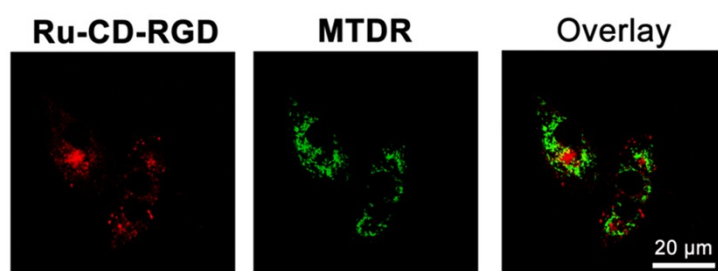

**Fig. S11** Determination of colocalization of **Ru-CD-RGD** with **MTDR** by confocal microscopy. U87MG cells were incubated with **Ru-CD-RGD** (10  $\mu$ M, 24 h), and then stained with **MTDR** (50 nM, 30 min) at 37  $^{\circ}$ C. **Ru-CD-RGD**:  $\lambda_{\text{ex}} = 488$  nm,  $\lambda_{\text{em}} = 620 \pm 20$  nm; **MTDR**:  $\lambda_{\text{ex}} = 633$  nm,  $\lambda_{\text{em}} = 665 \pm 20$  nm.

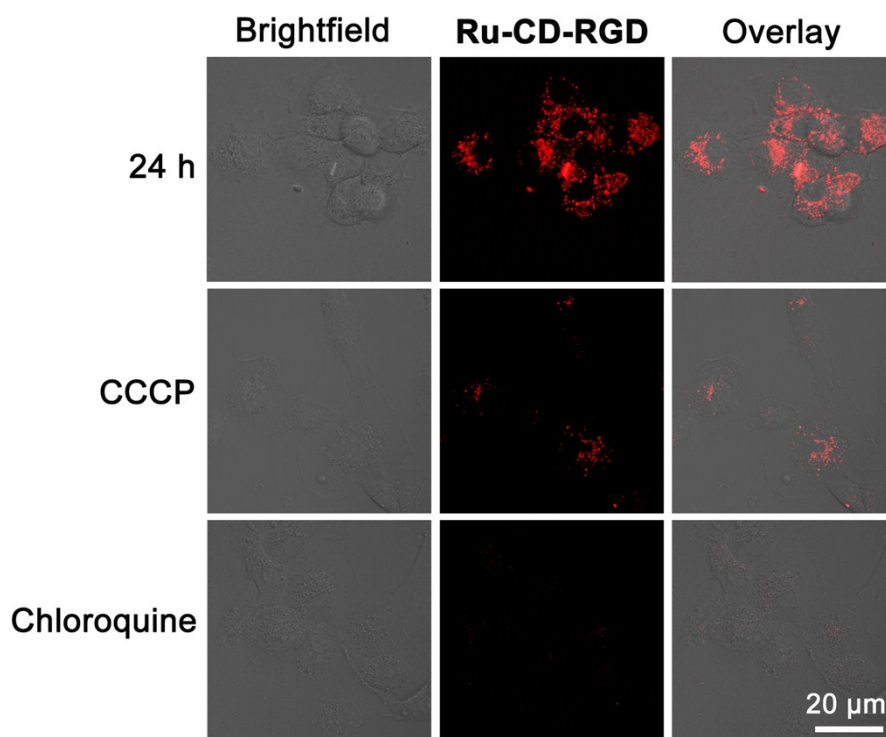

**Fig. S12** Confocal images of U87MG cells incubated with **Ru-CD-RGD** (10  $\mu$ M,  $\lambda_{\text{ex}} = 488$  nm,  $\lambda_{\text{em}} = 620 \pm 20$  nm) for 24 h (the 1<sup>st</sup> line) and pretreatment with CCCP (30  $\mu$ M, 1 h, the 2<sup>ed</sup> line) or CQ (50  $\mu$ M, 1 h, the 3<sup>rd</sup> line) at 37  $^{\circ}$ C.

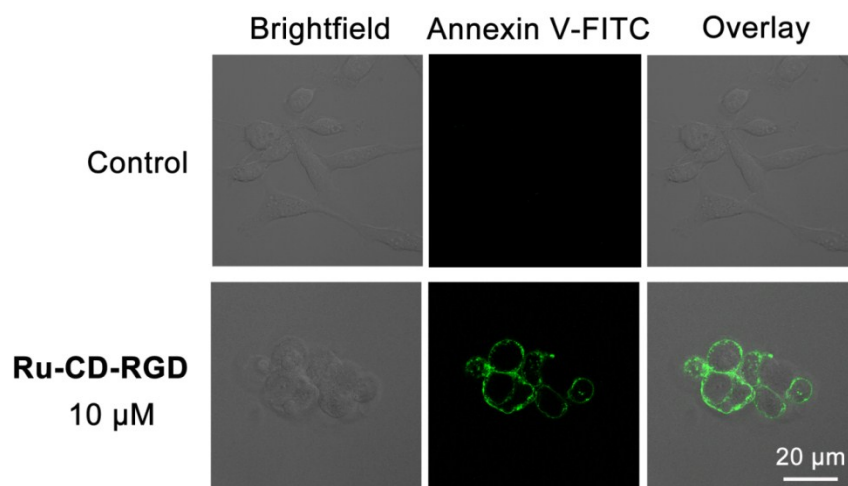

**Fig. S13** Annexin V staining assay analyzed by confocal microscopy. U87MG cells were treated with **Ru-CD-RGD** (10  $\mu$ M) for 24 h.  $\lambda_{\text{ex}} = 488$  nm;  $\lambda_{\text{em}} = 530 \pm 20$  nm.



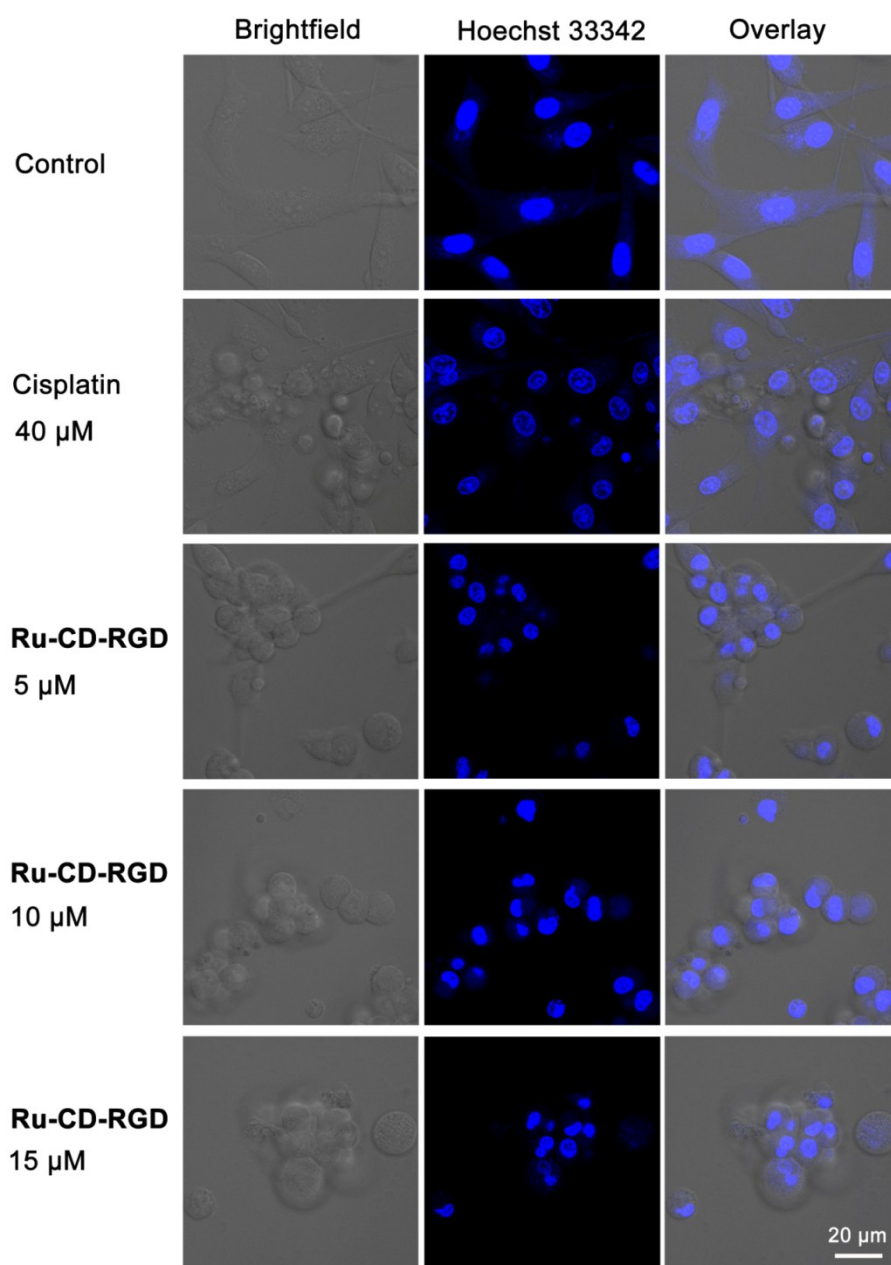

**Fig. S14** Hoechst 33342 stained U87MG cells treated with **Ru-CD-RGD** or cisplatin at the indicated concentrations for 24 h. The concentration of **Ru-CD-RGD** was determined based on the content of Ru(II) in solution.  $\lambda_{\text{ex}}$ : 405 nm;  $\lambda_{\text{em}}$ :  $460 \pm 20$  nm.

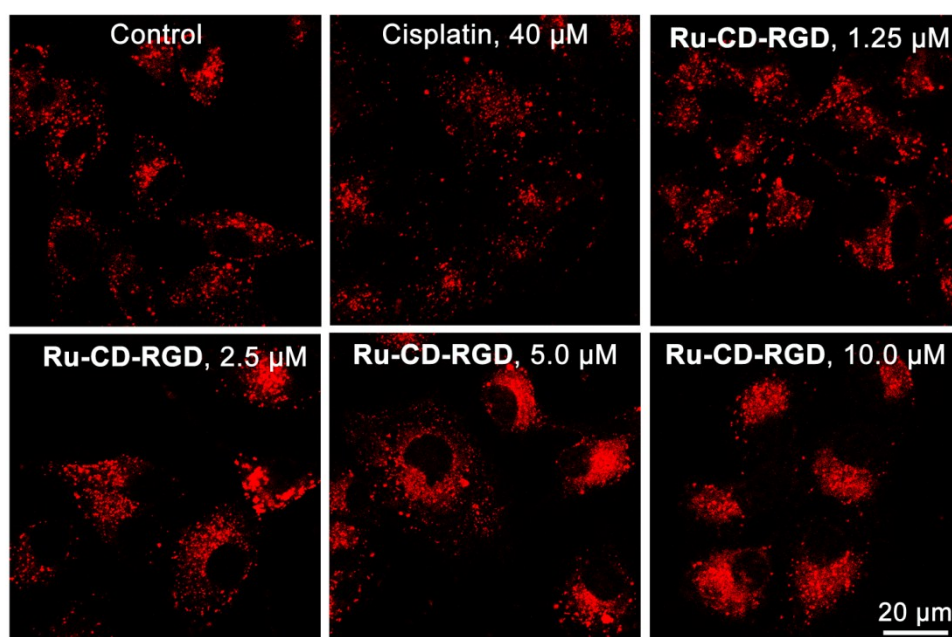

**Fig. S15** Observation of cathepsin B release from lysosomes to the cytosol induced by **Ru-CD-RGD** or cisplatin at the indicated concentrations for 24 h in U87MG using the fluorogenic substrate Magic Red MR-(RR)<sub>2</sub>. Emission was collected at  $630 \pm 20$  nm upon excitation at 543 nm.

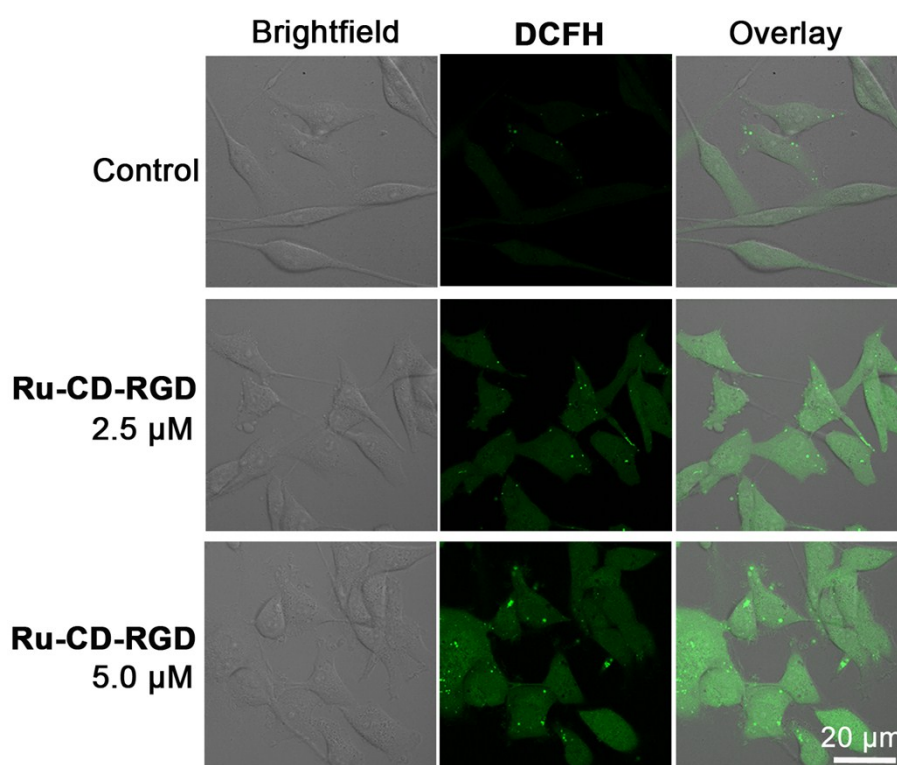

**Fig. S16** Effects of **Ru-CD-RGD** on ROS generation. U87MG cells were incubated with **Ru-CD-RGD** at the indicated concentrations for 24 h, after which they were labeled with DCFH-DA and analyzed by confocal microscope (excitation at 488 nm and emission at 500–530 nm).

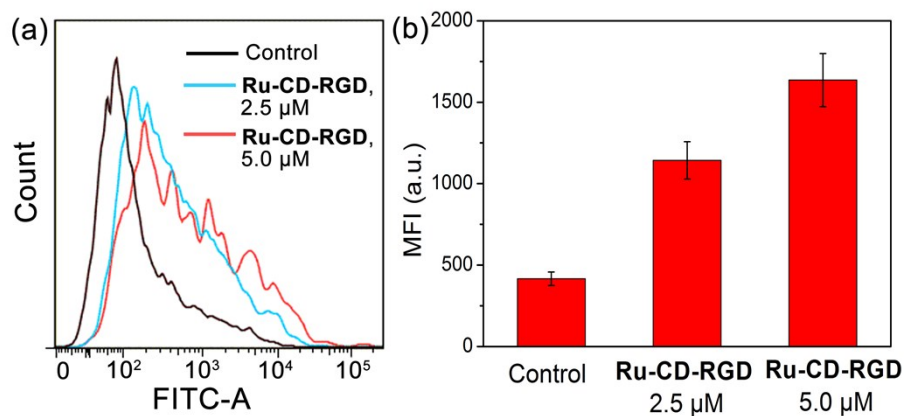

**Fig. S17** Effects of **Ru-CD-RGD** on ROS generation. (a) U87MG cells were incubated with **Ru-CD-RGD** at the indicated concentrations for 24 h, after which they were labeled with DCFH-DA and analyzed by flow cytometry (excitation at 488 nm and emission at 500–530 nm). (b) The MFI of DCF fluorescence intensity in U87MG cells after treatment with **Ru-CD-RGD** at the indicated concentrations. Data are represented as means  $\pm$  SD of three independent experiments.

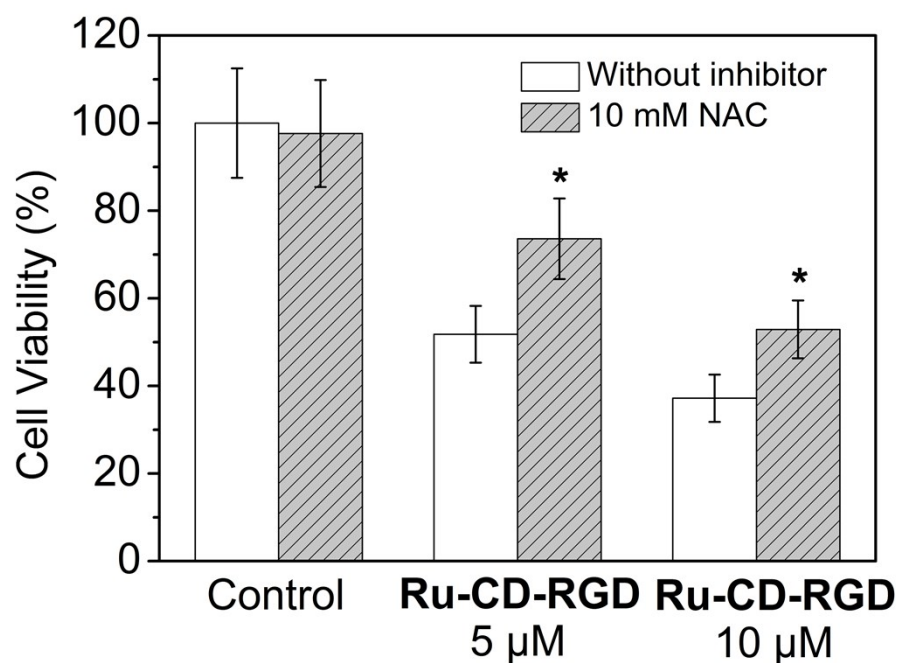

**Fig. S18** The impact of NAC on the cytotoxicity of **Ru-CD-RGD**. U87MG cells were treated with **Ru-CD-RGD** for 48 h at the indicated concentrations in the absence or presence of NAC. Cell viability was measured by MTT assay. Data are represented as means  $\pm$  SD of three independent experiments. \* $p < 0.05$ , \*\* $p < 0.01$ .

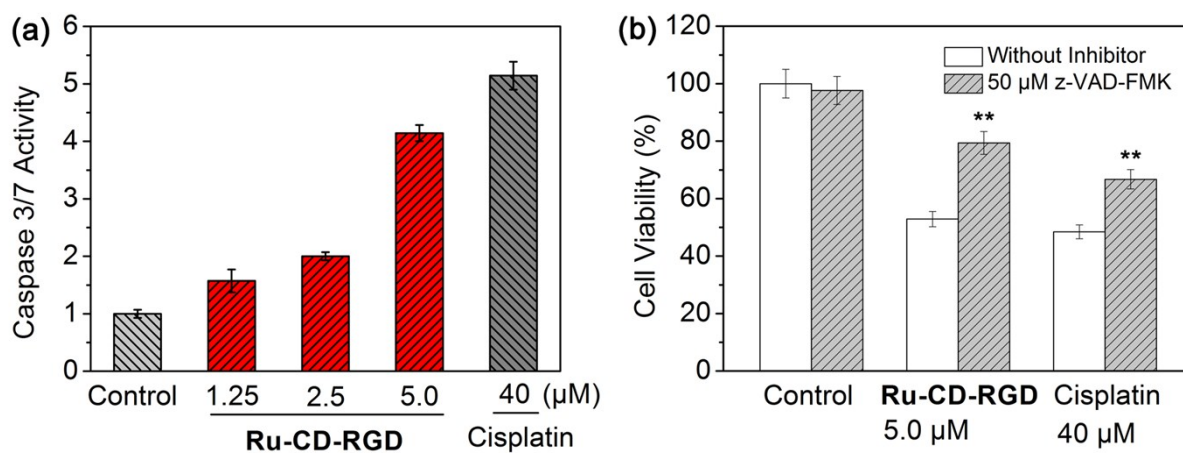

**Fig. S19** Apoptosis induced by **Ru-CD-RGD** is caspase-dependent. (a) Detection of caspase-3/7 activity in U87MG cells after **Ru-CD-RGD** or cisplatin treatment for 24 h at the indicated concentrations. (b) The impact of z-VAD-FMK on the cytotoxicity of **Ru-CD-RGD**. U87MG cells were treated with **Ru-CD-RGD** or cisplatin for 48 h at the indicated concentrations in the absence or presence of z-VAD-FMK. Cell viability was measured by MTT assay. Data are represented as means  $\pm$  SD of three independent experiments. \* $p < 0.05$ , \*\* $p < 0.01$ .

**Table S1.** Photophysical data for **Ru-CD** and **Ru-CD-RGD**<sup>a</sup>

| Compounds                              | Medium           | $\lambda_{\text{abs,max}}$ (nm) | $\lambda_{\text{em,max}}$ (nm) | $\Phi_{\text{em}}^b$ | $\tau_{\text{av}}$ / ns <sup>c</sup> |
|----------------------------------------|------------------|---------------------------------|--------------------------------|----------------------|--------------------------------------|
| <b>Ru-CD</b>                           | H <sub>2</sub> O | 445                             | 627                            | 0.058                | 507.4979                             |
|                                        | PBS              | 452                             | 629                            | 0.080                | 494.1338                             |
| <b>Ru-CD-RGD</b>                       | H <sub>2</sub> O | 442                             | 632                            | 0.063                | 501.9282                             |
|                                        | PBS              | 452                             | 628                            | 0.070                | 519.3832                             |
| [Ru(bpy) <sub>3</sub> ]Cl <sub>2</sub> | H <sub>2</sub> O | 453                             | 627                            | 0.042                | 357.4476                             |
|                                        | PBS              | 453                             | 627                            | 0.042                | 348.0846                             |

<sup>a</sup>All emission decays were obtained on freshly prepared samples placed in quartz cuvettes. Samples were  $1.0 \times 10^{-5}$  M in concentration. <sup>b</sup>Solutions of [Ru(bpy)<sub>3</sub>]Cl<sub>2</sub> were used as the standard, H<sub>2</sub>O and PBS are both degassed ( $\Phi_{\text{em}} = 0.042$ )<sup>1</sup>. <sup>c</sup>Decay curves of compounds were recorded by an Edinburgh FLS 980 Spectrometer. All curves were fitted into a two exponential formula  $F(t) = A + B_1 \exp(-t/\tau_1) + B_2 \exp(-t/\tau_2) + B_3 \exp(-t/\tau_3)$ ;

$$\tau_{\text{av}} = \frac{B_1\tau_1^2 + B_2\tau_2^2 + B_3\tau_3^2}{B_1\tau_1 + B_2\tau_2 + B_3\tau_3}$$

**Table S2.** Cell uptake of **Ru-CD-RGD** (10  $\mu$ M) or **Ru-CD** (10  $\mu$ M) in U87MG and MCF-7 determined by ICP-MS after 24 h incubation. Data are represented as means  $\pm$  SD of three independent experiments.

|                  | U87MG (ng/10 <sup>6</sup> cells) | MCF-7 (ng/10 <sup>6</sup> cells) |
|------------------|----------------------------------|----------------------------------|
| <b>Ru-CD-RGD</b> | 12.7 $\pm$ 0.6                   | 3.9 $\pm$ 0.3                    |
| <b>Ru-CD</b>     | 2.6 $\pm$ 0.2                    | undetermined                     |

### Supporting References

- 1 J. Van Houten and R. Watts, *J. Am. Chem. Soc.*, 1976, **98**, 4853.
- 2 B. Sullivan, D. Salmon and T. J. Meyer, *Inorg. Chem.*, 1978, **17**, 3334.
- 3 Y. H. Zhou, M. Zhao, J. H. Li, Z. W. Mao and L. N. Ji, *J. Mol. Catal. A Chem.*, 2008, **293**, 59.
